# Supplementary material for: Genes Encoding Teleost Orthologs of Human Haploinsufficient and Monoallelically Expressed Genes Remain in Duplicate More Frequently Than the Whole Genome
Source: Hindawi journal article supplement (doi:10.1155/2021/9028667), 2021-07-29
Supplement: f1 [file 9028667.f1.zip]

# X Chromosome

| Species                 | Genome                      |                                |                                         |                       |
|-------------------------|-----------------------------|--------------------------------|-----------------------------------------|-----------------------|
|                         | Number of single copy genes | Number of duplicate copy genes | Number of triplicate or more copy genes | Total number of genes |
| Amazon molly            | 10313                       | 2909                           | 712                                     | 13934                 |
| Atlantic herring        | 10198                       | 2818                           | 624                                     | 13640                 |
| Atlantic salmon         | 3919                        | 6418                           | 4147                                    | 14484                 |
| Ballan wrasse           | 9759                        | 3130                           | 1027                                    | 13916                 |
| Barramundi perch        | 10123                       | 3089                           | 836                                     | 14048                 |
| Blue tilapia            | 10480                       | 2910                           | 651                                     | 14041                 |
| Blunt-snouted clingfish | 10139                       | 2552                           | 549                                     | 13240                 |
| Brown trout             | 3744                        | 7066                           | 3816                                    | 14626                 |
| Burton's mouthbrooder   | 10678                       | 2836                           | 514                                     | 14028                 |
| Channel bull blenny     | 10109                       | 2678                           | 517                                     | 13304                 |
| Channel catfish         | 10868                       | 2672                           | 590                                     | 14130                 |
| Climbing perch          | 10638                       | 2979                           | 540                                     | 14157                 |
| Cod                     | 10411                       | 2323                           | 379                                     | 13113                 |
| Common carp             | 3530                        | 5699                           | 4772                                    | 14001                 |
| Denticle herring        | 9916                        | 3182                           | 798                                     | 13896                 |
| Eastern happy           | 10464                       | 2865                           | 713                                     | 14042                 |
| Electric eel            | 10526                       | 2973                           | 513                                     | 14012                 |
| European seabass        | 10503                       | 2861                           | 442                                     | 13806                 |
| Fugu                    | 10133                       | 2549                           | 576                                     | 13258                 |
| Gilthead seabream       | 10711                       | 2870                           | 495                                     | 14076                 |
| Greater amberjack       | 10750                       | 2957                           | 552                                     | 14259                 |
| Guppy                   | 10623                       | 2662                           | 509                                     | 13794                 |
| Huchen                  | 3797                        | 6234                           | 4510                                    | 14541                 |
| Indian glassy fish      | 10440                       | 2833                           | 556                                     | 13829                 |
| Indian medaka           | 10589                       | 2798                           | 531                                     | 13918                 |
| Japanese medaka HdrR    | 10699                       | 2557                           | 474                                     | 13730                 |
| Japanese medaka HNI     | 10528                       | 2432                           | 426                                     | 13386                 |
| Japanese medaka HSOK    | 10609                       | 2563                           | 455                                     | 13627                 |
| Jewelled blenny         | 9907                        | 2882                           | 881                                     | 13670                 |
| Large yellow croaker    | 10645                       | 2916                           | 464                                     | 14025                 |
| Live sharksucker        | 10656                       | 2761                           | 422                                     | 13839                 |
| Lyretail cichlid        | 10331                       | 2816                           | 640                                     | 13787                 |
| Makobe Island cichlid   | 10552                       | 2881                           | 537                                     | 13970                 |
| Mexican tetra           | 10464                       | 3139                           | 621                                     | 14224                 |
| Midas cichlid           | 10441                       | 2761                           | 595                                     | 13797                 |
| Mummichog               | 10489                       | 2813                           | 553                                     | 13855                 |
| Nile tilapia            | 10588                       | 2803                           | 574                                     | 13965                 |
| Northern pike           | 10447                       | 3354                           | 462                                     | 14263                 |
| Orbiculate cardinalfish | 10081                       | 2994                           | 797                                     | 13872                 |
| Pachon cavefish         | 10333                       | 2844                           | 497                                     | 13674                 |
| Pinecone soldierfish    | 10486                       | 3042                           | 553                                     | 14081                 |
| Rainbow trout           | 4274                        | 6304                           | 3445                                    | 14023                 |
| Red-bellied piranha     | 10767                       | 3201                           | 589                                     | 14557                 |
| Sailfin molly           | 10238                       | 2843                           | 780                                     | 13861                 |
| Sheepshead minnow       | 10388                       | 2800                           | 597                                     | 13785                 |

# X Chromosome

|                       |            |            |           |             |
|-----------------------|------------|------------|-----------|-------------|
| Shortfin molly        | 10174      | 2962       | 780       | 13916       |
| Siamese fighting fish | 10663      | 2637       | 432       | 13732       |
| Stickleback           | 10384      | 2474       | 337       | 13195       |
| Swamp eel             | 10771      | 2672       | 512       | 13955       |
| Tetraodon             | 9699       | 2576       | 643       | 12918       |
| Tiger tail seahorse   | 10485      | 2519       | 512       | 13516       |
| Tongue sole           | 10473      | 2615       | 555       | 13643       |
| Turbot                | 10755      | 2757       | 340       | 13852       |
| Yellowtail amberjack  | 10347      | 3084       | 735       | 14166       |
| Zebra mbuna           | 10262      | 3037       | 831       | 14130       |
| Zebrafish             | 10601      | 2942       | 552       | 14095       |
| Zig-zag eel           | 10768      | 2867       | 431       | 14066       |
|                       |            |            |           |             |
| <b>MAXIMAL</b>        | 10868      | 7066       | 4772      | 14626       |
| <b>MINIMAL</b>        | 3530       | 2323       | 337       | 12918       |
| <b>MOYENNE</b>        | 9853,78947 | 3135,28070 | 892,82456 | 13881,89474 |

## X Chromosome

### X chromosome genes

| Number of X<br>chromosome<br>teleost orthologs<br>returned in<br>singleton | Number of X<br>chromosome<br>teleost orthologs<br>remained in<br>duplicate | Number of X<br>chromosome<br>teleost orthologs<br>remained in<br>triplicate or more | Total number of X<br>chromosome genes |
|----------------------------------------------------------------------------|----------------------------------------------------------------------------|-------------------------------------------------------------------------------------|---------------------------------------|
| 122                                                                        | 30                                                                         | 4                                                                                   | 156                                   |
| 112                                                                        | 35                                                                         | 3                                                                                   | 150                                   |
| 37                                                                         | 79                                                                         | 46                                                                                  | 162                                   |
| 116                                                                        | 34                                                                         | 8                                                                                   | 158                                   |
| 110                                                                        | 40                                                                         | 6                                                                                   | 156                                   |
| 126                                                                        | 32                                                                         | 2                                                                                   | 160                                   |
| 123                                                                        | 25                                                                         | 4                                                                                   | 152                                   |
| 39                                                                         | 78                                                                         | 45                                                                                  | 162                                   |
| 129                                                                        | 26                                                                         | 4                                                                                   | 159                                   |
| 120                                                                        | 28                                                                         | 3                                                                                   | 151                                   |
| 132                                                                        | 31                                                                         | 2                                                                                   | 165                                   |
| 124                                                                        | 31                                                                         | 3                                                                                   | 158                                   |
| 120                                                                        | 28                                                                         | 2                                                                                   | 150                                   |
| 38                                                                         | 71                                                                         | 50                                                                                  | 159                                   |
| 113                                                                        | 35                                                                         | 11                                                                                  | 159                                   |
| 123                                                                        | 27                                                                         | 5                                                                                   | 155                                   |
| 123                                                                        | 34                                                                         | 2                                                                                   | 159                                   |
| 122                                                                        | 30                                                                         | 0                                                                                   | 152                                   |
| 125                                                                        | 25                                                                         | 4                                                                                   | 154                                   |
| 121                                                                        | 32                                                                         | 0                                                                                   | 153                                   |
| 126                                                                        | 29                                                                         | 2                                                                                   | 157                                   |
| 125                                                                        | 29                                                                         | 2                                                                                   | 156                                   |
| 32                                                                         | 78                                                                         | 54                                                                                  | 164                                   |
| 122                                                                        | 33                                                                         | 3                                                                                   | 158                                   |
| 127                                                                        | 31                                                                         | 3                                                                                   | 161                                   |
| 131                                                                        | 26                                                                         | 1                                                                                   | 158                                   |
| 126                                                                        | 26                                                                         | 1                                                                                   | 153                                   |
| 127                                                                        | 25                                                                         | 2                                                                                   | 154                                   |
| 123                                                                        | 28                                                                         | 5                                                                                   | 156                                   |
| 127                                                                        | 32                                                                         | 2                                                                                   | 161                                   |
| 129                                                                        | 25                                                                         | 3                                                                                   | 157                                   |
| 126                                                                        | 29                                                                         | 3                                                                                   | 158                                   |
| 124                                                                        | 30                                                                         | 3                                                                                   | 157                                   |
| 114                                                                        | 44                                                                         | 3                                                                                   | 161                                   |
| 124                                                                        | 30                                                                         | 2                                                                                   | 156                                   |
| 127                                                                        | 23                                                                         | 5                                                                                   | 155                                   |
| 124                                                                        | 29                                                                         | 3                                                                                   | 156                                   |
| 114                                                                        | 43                                                                         | 2                                                                                   | 159                                   |
| 122                                                                        | 29                                                                         | 6                                                                                   | 157                                   |
| 111                                                                        | 42                                                                         | 2                                                                                   | 155                                   |
| 126                                                                        | 29                                                                         | 4                                                                                   | 159                                   |
| 42                                                                         | 78                                                                         | 39                                                                                  | 159                                   |
| 118                                                                        | 42                                                                         | 4                                                                                   | 164                                   |
| 126                                                                        | 32                                                                         | 3                                                                                   | 161                                   |
| 132                                                                        | 24                                                                         | 4                                                                                   | 160                                   |

# X Chromosome

|           |          |         |           |
|-----------|----------|---------|-----------|
| 127       | 29       | 4       | 160       |
| 125       | 27       | 3       | 155       |
| 121       | 26       | 1       | 148       |
| 128       | 26       | 5       | 159       |
| 110       | 33       | 1       | 144       |
| 121       | 32       | 2       | 155       |
| 125       | 25       | 5       | 155       |
| 128       | 29       | 2       | 159       |
| 124       | 30       | 5       | 159       |
| 121       | 33       | 6       | 160       |
| 122       | 38       | 2       | 162       |
| 132       | 25       | 6       | 163       |
|           |          |         |           |
| 132       | 79       | 54      | 165       |
| 32        | 23       | 0       | 144       |
| 115,50877 | 34,56140 | 7,14035 | 157,21053 |

# X Chromosome

## Comparison between singleton, duplicate, triplicate and more copies

| Chi2 test    | Chi2 test p-value | Chi2 test FDR (Benjamini-Hochberg procedure) | Hypergeometric test p-value | Hypergeometric test FDR (Benjamini-Hochberg procedure) |
|--------------|-------------------|----------------------------------------------|-----------------------------|--------------------------------------------------------|
| 1,4252441964 | 0,2325421590      | 0,5358397208                                 | 0,9037804847                | 0,9884503281                                           |
| 0,0007749713 | 0,9777911141      | 0,9777911141                                 | 0,5204207194                | 0,9884503281                                           |
| 1,4603177402 | 0,2268795717      | 0,5358397208                                 | 0,1291340065                | 0,9884503281                                           |
| 0,8162863499 | 0,3662681920      | 0,5358397208                                 | 0,8404096812                | 0,9884503281                                           |
| 0,1854944212 | 0,6666933307      | 0,7600303970                                 | 0,3614405237                | 0,9884503281                                           |
| 1,4287986592 | 0,2319605980      | 0,5358397208                                 | 0,9040324714                | 0,9884503281                                           |
| 1,5980960560 | 0,2061732362      | 0,5358397208                                 | 0,9169064225                | 0,9884503281                                           |
| 0,1976021253 | 0,6566633431      | 0,7600303970                                 | 0,3655547669                | 0,9884503281                                           |
| 2,1980089024 | 0,1381891322      | 0,5358397208                                 | 0,9465651825                | 0,9884503281                                           |
| 1,0053114091 | 0,3160287064      | 0,5358397208                                 | 0,8661727938                | 0,9884503281                                           |
| 0,8847556329 | 0,3469024498      | 0,5358397208                                 | 0,8510313397                | 0,9884503281                                           |
| 0,9425104321 | 0,3316330579      | 0,5358397208                                 | 0,8580368748                | 0,9884503281                                           |
| 0,0336166531 | 0,8545246232      | 0,9190170476                                 | 0,6055502713                | 0,9884503281                                           |
| 0,1453975440 | 0,7029730125      | 0,7856757199                                 | 0,3905705266                | 0,9884503281                                           |
| 0,0065192884 | 0,9356470467      | 0,9696705757                                 | 0,4978806621                | 0,9884503281                                           |
| 1,9087165206 | 0,1671058993      | 0,5358397208                                 | 0,9334918817                | 0,9884503281                                           |
| 0,4257974428 | 0,5140583172      | 0,6511405352                                 | 0,7708676140                | 0,9884503281                                           |
| 1,4644516350 | 0,2262231451      | 0,5358397208                                 | 0,9075792428                | 0,9884503281                                           |
| 1,9202366087 | 0,1658305791      | 0,5358397208                                 | 0,9347938758                | 0,9884503281                                           |
| 0,7523857034 | 0,3857219526      | 0,5358397208                                 | 0,8331480781                | 0,9884503281                                           |
| 2,0018735843 | 0,1571049089      | 0,5358397208                                 | 0,9380939788                | 0,9884503281                                           |
| 0,8558250237 | 0,3549096725      | 0,5358397208                                 | 0,8478939476                | 0,9884503281                                           |
| 3,7028569750 | 0,0543193836      | 0,5358397208                                 | 0,0297169721                | 0,9884503281                                           |
| 0,2531408592 | 0,6148721336      | 0,7456959918                                 | 0,7220193429                | 0,9884503281                                           |
| 0,6939524762 | 0,4048232419      | 0,5366261579                                 | 0,8235208834                | 0,9884503281                                           |
| 2,2843990657 | 0,1306807484      | 0,5358397208                                 | 0,9504959043                | 0,9884503281                                           |
| 1,2497827936 | 0,2635939666      | 0,5358397208                                 | 0,8914695859                | 0,9884503281                                           |
| 1,9020505876 | 0,1678489725      | 0,5358397208                                 | 0,9343962531                | 0,9884503281                                           |
| 3,1765300716 | 0,0747032133      | 0,5358397208                                 | 0,9727043867                | 0,9884503281                                           |
| 0,7825804364 | 0,3763531107      | 0,5358397208                                 | 0,8369927025                | 0,9884503281                                           |
| 2,3656858623 | 0,1240293912      | 0,5358397208                                 | 0,9530742764                | 0,9884503281                                           |
| 1,9493043731 | 0,1626618309      | 0,5358397208                                 | 0,9354847952                | 0,9884503281                                           |
| 1,0097663794 | 0,3149588138      | 0,5358397208                                 | 0,8660674339                | 0,9884503281                                           |
| 0,6299162345 | 0,4273860413      | 0,5536591898                                 | 0,2372721472                | 0,9884503281                                           |
| 1,2310564103 | 0,2672016898      | 0,5358397208                                 | 0,8884103467                | 0,9884503281                                           |
| 3,2709010954 | 0,0705188793      | 0,5358397208                                 | 0,9751548546                | 0,9884503281                                           |
| 1,1454384774 | 0,2845060759      | 0,5358397208                                 | 0,8804271051                | 0,9884503281                                           |
| 0,1942649292 | 0,6593904080      | 0,7600303970                                 | 0,3575766708                | 0,9884503281                                           |
| 2,0044483731 | 0,1568383378      | 0,5358397208                                 | 0,9374406379                | 0,9884503281                                           |
| 1,3123926789 | 0,2519619044      | 0,5358397208                                 | 0,1453017937                | 0,9884503281                                           |
| 1,9076974844 | 0,1672192503      | 0,5358397208                                 | 0,9332535673                | 0,9884503281                                           |
| 1,2389811038 | 0,2656675104      | 0,5358397208                                 | 0,1506171372                | 0,9884503281                                           |
| 0,3451643289 | 0,5568633341      | 0,6900263052                                 | 0,3044476769                | 0,9884503281                                           |
| 1,6137288039 | 0,2039684383      | 0,5358397208                                 | 0,9165026779                | 0,9884503281                                           |
| 4,3957624193 | 0,0360283473      | 0,5358397208                                 | 0,9884503281                | 0,9884503281                                           |

# X Chromosome

|              |              |              |              |              |
|--------------|--------------|--------------|--------------|--------------|
| 3,1943544406 | 0,0738929389 | 0,5358397208 | 0,9730642880 | 0,9884503281 |
| 0,8008441076 | 0,3708411150 | 0,5358397208 | 0,8406801930 | 0,9884503281 |
| 0,8267563513 | 0,3632121439 | 0,5358397208 | 0,8453029151 | 0,9884503281 |
| 0,9947892568 | 0,3185746487 | 0,5358397208 | 0,8648507067 | 0,9884503281 |
| 0,1316011127 | 0,7167776926 | 0,7856986246 | 0,6732391382 | 0,9884503281 |
| 0,0213743692 | 0,8837636968 | 0,9328616800 | 0,5898908577 | 0,9884503281 |
| 1,3085820579 | 0,2526515420 | 0,5358397208 | 0,8955877737 | 0,9884503281 |
| 0,7496939388 | 0,3865731488 | 0,5358397208 | 0,8329185148 | 0,9884503281 |
| 1,9755813287 | 0,1598566796 | 0,5358397208 | 0,9361037562 | 0,9884503281 |
| 0,7240174447 | 0,3948292679 | 0,5358397208 | 0,8273175633 | 0,9884503281 |
| 0,0008272669 | 0,9770542109 | 0,9777911141 | 0,5420031344 | 0,9884503281 |
| 1,7807311656 | 0,1820595691 | 0,5358397208 | 0,9271398266 | 0,9884503281 |
| 4,39576      | 0,97779      | 0,97779      | 0,98845      | 0,98845      |
| 0,00077      | 0,03603      | 0,53584      | 0,02972      | 0,98845      |
| 1,27767      | 0,35576      | 0,60195      | 0,74565      | 0,98845      |

**Comparison between tripli or  
more copies and dupli or less  
copies**

| <b>Hypergeometric<br/>test<br/>p-value</b> | <b>Hypergeometric<br/>test FDR<br/>(Benjamini-<br/>Hochberg<br/>procedure)</b> |
|--------------------------------------------|--------------------------------------------------------------------------------|
| 0,9612438914                               | 1,0000000000                                                                   |
| 0,9704698845                               | 1,0000000000                                                                   |
| 0,5565964067                               | 1,0000000000                                                                   |
| 0,9046347538                               | 1,0000000000                                                                   |
| 0,9085976049                               | 1,0000000000                                                                   |
| 0,9957344967                               | 1,0000000000                                                                   |
| 0,8805491706                               | 1,0000000000                                                                   |
| 0,3396552965                               | 1,0000000000                                                                   |
| 0,8392150573                               | 1,0000000000                                                                   |
| 0,9365777269                               | 1,0000000000                                                                   |
| 0,9930292319                               | 1,0000000000                                                                   |
| 0,9435340861                               | 1,0000000000                                                                   |
| 0,9339243179                               | 1,0000000000                                                                   |
| 0,7841156678                               | 1,0000000000                                                                   |
| 0,3058024461                               | 1,0000000000                                                                   |
| 0,9000371211                               | 1,0000000000                                                                   |
| 0,9817342310                               | 1,0000000000                                                                   |
| 1,0000000000                               | 1,0000000000                                                                   |
| 0,9069220097                               | 1,0000000000                                                                   |
| 1,0000000000                               | 1,0000000000                                                                   |
| 0,9854854784                               | 1,0000000000                                                                   |
| 0,9806772683                               | 1,0000000000                                                                   |
| 0,3243935096                               | 1,0000000000                                                                   |
| 0,9559402904                               | 1,0000000000                                                                   |
| 0,9482372724                               | 1,0000000000                                                                   |
| 0,9962408394                               | 1,0000000000                                                                   |
| 0,9931056633                               | 1,0000000000                                                                   |
| 0,9668394160                               | 1,0000000000                                                                   |
| 0,9758491395                               | 1,0000000000                                                                   |
| 0,9717047092                               | 1,0000000000                                                                   |
| 0,8618592457                               | 1,0000000000                                                                   |
| 0,9796519620                               | 1,0000000000                                                                   |
| 0,9439139871                               | 1,0000000000                                                                   |
| 0,9739740256                               | 1,0000000000                                                                   |
| 0,9919581591                               | 1,0000000000                                                                   |
| 0,7462599508                               | 1,0000000000                                                                   |
| 0,9579323800                               | 1,0000000000                                                                   |
| 0,9670040529                               | 1,0000000000                                                                   |
| 0,8939194345                               | 1,0000000000                                                                   |
| 0,9784645583                               | 1,0000000000                                                                   |
| 0,8758019579                               | 1,0000000000                                                                   |
| 0,5353203318                               | 1,0000000000                                                                   |
| 0,9031756436                               | 1,0000000000                                                                   |
| 0,9951429448                               | 1,0000000000                                                                   |
| 0,9203217315                               | 1,0000000000                                                                   |

## X Chromosome

|              |              |
|--------------|--------------|
| 0,9812899769 | 1,0000000000 |
| 0,8701178145 | 1,0000000000 |
| 0,9787371887 | 1,0000000000 |
| 0,6983732262 | 1,0000000000 |
| 0,9993852412 | 1,0000000000 |
| 0,9825771997 | 1,0000000000 |
| 0,7610721528 | 1,0000000000 |
| 0,9051386363 | 1,0000000000 |
| 0,9205656582 | 1,0000000000 |
| 0,9148378336 | 1,0000000000 |
| 0,9885644195 | 1,0000000000 |
| 0,3830100486 | 1,0000000000 |

|         |         |
|---------|---------|
| 1,00000 | 1,00000 |
| 0,30580 | 1,00000 |
| 0,87806 | 1,00000 |
