# Supplementary material for: Genes Encoding Teleost Orthologs of Human Haploinsufficient and Monoallelically Expressed Genes Remain in Duplicate More Frequently Than the Whole Genome
Source: Hindawi journal article supplement (doi:10.1155/2021/9028667), 2021-07-29
Supplement: f1 [file 9028667.f1.zip]

# Haploinsufficient

| Species                 | Genome                      |                                |                                         |                       |
|-------------------------|-----------------------------|--------------------------------|-----------------------------------------|-----------------------|
|                         | Number of single copy genes | Number of duplicate copy genes | Number of triplicate or more copy genes | Total number of genes |
| Amazon molly            | 10313                       | 2909                           | 712                                     | 13934                 |
| Atlantic herring        | 10198                       | 2818                           | 624                                     | 13640                 |
| Atlantic salmon         | 3919                        | 6418                           | 4147                                    | 14484                 |
| Ballan wrasse           | 9759                        | 3130                           | 1027                                    | 13916                 |
| Barramundi perch        | 10123                       | 3089                           | 836                                     | 14048                 |
| Blue tilapia            | 10480                       | 2910                           | 651                                     | 14041                 |
| Blunt-snouted clingfish | 10139                       | 2552                           | 549                                     | 13240                 |
| Brown trout             | 3744                        | 7066                           | 3816                                    | 14626                 |
| Burton's mouthbrooder   | 10678                       | 2836                           | 514                                     | 14028                 |
| Channel bull blenny     | 10109                       | 2678                           | 517                                     | 13304                 |
| Channel catfish         | 10868                       | 2672                           | 590                                     | 14130                 |
| Climbing perch          | 10638                       | 2979                           | 540                                     | 14157                 |
| Cod                     | 10411                       | 2323                           | 379                                     | 13113                 |
| Common carp             | 3530                        | 5699                           | 4772                                    | 14001                 |
| Denticle herring        | 9916                        | 3182                           | 798                                     | 13896                 |
| Eastern happy           | 10464                       | 2865                           | 713                                     | 14042                 |
| Electric eel            | 10526                       | 2973                           | 513                                     | 14012                 |
| European seabass        | 10503                       | 2861                           | 442                                     | 13806                 |
| Fugu                    | 10133                       | 2549                           | 576                                     | 13258                 |
| Gilthead seabream       | 10711                       | 2870                           | 495                                     | 14076                 |
| Greater amberjack       | 10750                       | 2957                           | 552                                     | 14259                 |
| Guppy                   | 10623                       | 2662                           | 509                                     | 13794                 |
| Huchen                  | 3797                        | 6234                           | 4510                                    | 14541                 |
| Indian glassy fish      | 10440                       | 2833                           | 556                                     | 13829                 |
| Indian medaka           | 10589                       | 2798                           | 531                                     | 13918                 |
| Japanese medaka HdrR    | 10699                       | 2557                           | 474                                     | 13730                 |
| Japanese medaka HNI     | 10528                       | 2432                           | 426                                     | 13386                 |
| Japanese medaka HSOK    | 10609                       | 2563                           | 455                                     | 13627                 |
| Jewelled blenny         | 9907                        | 2882                           | 881                                     | 13670                 |
| Large yellow croaker    | 10645                       | 2916                           | 464                                     | 14025                 |
| Live sharksucker        | 10656                       | 2761                           | 422                                     | 13839                 |
| Lyretail cichlid        | 10331                       | 2816                           | 640                                     | 13787                 |
| Makobe Island cichlid   | 10552                       | 2881                           | 537                                     | 13970                 |
| Mexican tetra           | 10464                       | 3139                           | 621                                     | 14224                 |
| Midas cichlid           | 10441                       | 2761                           | 595                                     | 13797                 |
| Mummichog               | 10489                       | 2813                           | 553                                     | 13855                 |
| Nile tilapia            | 10588                       | 2803                           | 574                                     | 13965                 |
| Northern pike           | 10447                       | 3354                           | 462                                     | 14263                 |
| Orbiculate cardinalfish | 10081                       | 2994                           | 797                                     | 13872                 |
| Pachon cavefish         | 10333                       | 2844                           | 497                                     | 13674                 |
| Pinecone soldierfish    | 10486                       | 3042                           | 553                                     | 14081                 |
| Rainbow trout           | 4274                        | 6304                           | 3445                                    | 14023                 |
| Red-bellied piranha     | 10767                       | 3201                           | 589                                     | 14557                 |
| Sailfin molly           | 10238                       | 2843                           | 780                                     | 13861                 |
| Sheepshead minnow       | 10388                       | 2800                           | 597                                     | 13785                 |

# Haploinsufficient

|                       |            |            |           |             |
|-----------------------|------------|------------|-----------|-------------|
| Shortfin molly        | 10174      | 2962       | 780       | 13916       |
| Siamese fighting fish | 10663      | 2637       | 432       | 13732       |
| Stickleback           | 10384      | 2474       | 337       | 13195       |
| Swamp eel             | 10771      | 2672       | 512       | 13955       |
| Tetraodon             | 9699       | 2576       | 643       | 12918       |
| Tiger tail seahorse   | 10485      | 2519       | 512       | 13516       |
| Tongue sole           | 10473      | 2615       | 555       | 13643       |
| Turbot                | 10755      | 2757       | 340       | 13852       |
| Yellowtail amberjack  | 10347      | 3084       | 735       | 14166       |
| Zebra mbuna           | 10262      | 3037       | 831       | 14130       |
| Zebrafish             | 10601      | 2942       | 552       | 14095       |
| Zig-zag eel           | 10768      | 2867       | 431       | 14066       |
|                       |            |            |           |             |
| <b>MAXIMAL</b>        | 10868      | 7066       | 4772      | 14626       |
| <b>MINIMAL</b>        | 3530       | 2323       | 337       | 12918       |
| <b>MEAN</b>           | 9853,78947 | 3135,28070 | 892,82456 | 13881,89474 |

# Haploinsufficient

## Haploinsufficient genes

| Number of<br>haploinsufficient<br>teleost orthologs<br>returned in<br>singleton | Number of<br>haploinsufficient<br>teleost orthologs<br>remained in<br>duplicate | Number of<br>haploinsufficient<br>teleost orthologs<br>remained in<br>triplicate or more | Total number of<br>haploinsufficient<br>genes |
|---------------------------------------------------------------------------------|---------------------------------------------------------------------------------|------------------------------------------------------------------------------------------|-----------------------------------------------|
| 181                                                                             | 84                                                                              | 11                                                                                       | 276                                           |
| 175                                                                             | 76                                                                              | 9                                                                                        | 260                                           |
| 50                                                                              | 112                                                                             | 119                                                                                      | 281                                           |
| 179                                                                             | 79                                                                              | 18                                                                                       | 276                                           |
| 170                                                                             | 94                                                                              | 11                                                                                       | 275                                           |
| 193                                                                             | 78                                                                              | 6                                                                                        | 277                                           |
| 185                                                                             | 71                                                                              | 7                                                                                        | 263                                           |
| 48                                                                              | 120                                                                             | 111                                                                                      | 279                                           |
| 187                                                                             | 82                                                                              | 11                                                                                       | 280                                           |
| 189                                                                             | 71                                                                              | 11                                                                                       | 271                                           |
| 183                                                                             | 94                                                                              | 4                                                                                        | 281                                           |
| 190                                                                             | 83                                                                              | 7                                                                                        | 280                                           |
| 191                                                                             | 75                                                                              | 5                                                                                        | 271                                           |
| 47                                                                              | 103                                                                             | 124                                                                                      | 274                                           |
| 169                                                                             | 90                                                                              | 15                                                                                       | 274                                           |
| 186                                                                             | 78                                                                              | 13                                                                                       | 277                                           |
| 168                                                                             | 100                                                                             | 7                                                                                        | 275                                           |
| 186                                                                             | 82                                                                              | 5                                                                                        | 273                                           |
| 183                                                                             | 68                                                                              | 7                                                                                        | 258                                           |
| 188                                                                             | 86                                                                              | 3                                                                                        | 277                                           |
| 184                                                                             | 87                                                                              | 9                                                                                        | 280                                           |
| 190                                                                             | 73                                                                              | 14                                                                                       | 277                                           |
| 49                                                                              | 99                                                                              | 140                                                                                      | 288                                           |
| 181                                                                             | 82                                                                              | 10                                                                                       | 273                                           |
| 182                                                                             | 87                                                                              | 8                                                                                        | 277                                           |
| 194                                                                             | 82                                                                              | 6                                                                                        | 282                                           |
| 193                                                                             | 76                                                                              | 7                                                                                        | 276                                           |
| 189                                                                             | 75                                                                              | 6                                                                                        | 270                                           |
| 180                                                                             | 78                                                                              | 12                                                                                       | 270                                           |
| 190                                                                             | 82                                                                              | 3                                                                                        | 275                                           |
| 188                                                                             | 82                                                                              | 3                                                                                        | 273                                           |
| 177                                                                             | 84                                                                              | 12                                                                                       | 273                                           |
| 186                                                                             | 81                                                                              | 10                                                                                       | 277                                           |
| 169                                                                             | 101                                                                             | 8                                                                                        | 278                                           |
| 182                                                                             | 83                                                                              | 13                                                                                       | 278                                           |
| 190                                                                             | 78                                                                              | 8                                                                                        | 276                                           |
| 187                                                                             | 82                                                                              | 6                                                                                        | 275                                           |
| 168                                                                             | 102                                                                             | 6                                                                                        | 276                                           |
| 180                                                                             | 79                                                                              | 15                                                                                       | 274                                           |
| 173                                                                             | 90                                                                              | 5                                                                                        | 268                                           |
| 182                                                                             | 88                                                                              | 11                                                                                       | 281                                           |
| 56                                                                              | 122                                                                             | 98                                                                                       | 276                                           |
| 176                                                                             | 98                                                                              | 9                                                                                        | 283                                           |
| 179                                                                             | 83                                                                              | 15                                                                                       | 277                                           |
| 193                                                                             | 73                                                                              | 13                                                                                       | 279                                           |

# Haploinsufficient

|           |          |          |           |
|-----------|----------|----------|-----------|
| 176       | 86       | 18       | 280       |
| 199       | 76       | 4        | 279       |
| 194       | 74       | 5        | 273       |
| 192       | 77       | 7        | 276       |
| 168       | 83       | 16       | 267       |
| 185       | 74       | 12       | 271       |
| 190       | 74       | 13       | 277       |
| 190       | 82       | 6        | 278       |
| 180       | 89       | 11       | 280       |
| 182       | 85       | 14       | 281       |
| 177       | 95       | 7        | 279       |
| 192       | 83       | 4        | 279       |
|           |          |          |           |
| 199       | 122      | 140      | 288       |
| 47        | 68       | 3        | 258       |
| 171,77193 | 85,10526 | 18,73684 | 275,61404 |

# Haploinsufficient

## Comparison between singleton, duplicate, triplicate and more copies

| Chi2 test     | Chi2 test p-value | Chi2 test FDR (Benjamini-Hochberg procedure) | Hypergeometric test p-value | Hypergeometric test FDR (Benjamini-Hochberg procedure) |
|---------------|-------------------|----------------------------------------------|-----------------------------|--------------------------------------------------------|
| 10,2061590470 | 0,0013997239      | 0,0022845641                                 | 0,0010470035                | 0,0017051200                                           |
| 7,6645462790  | 0,0056316421      | 0,0069783391                                 | 0,0039069775                | 0,0048412548                                           |
| 12,2186004916 | 0,0004731541      | 0,0009988809                                 | 0,0001607143                | 0,0005348866                                           |
| 3,6630379059  | 0,0556321099      | 0,0566255404                                 | 0,0323212520                | 0,0328984172                                           |
| 14,3276075756 | 0,0001535957      | 0,0006734582                                 | 0,0001301982                | 0,0005300925                                           |
| 3,6050649087  | 0,0576038201      | 0,0576038201                                 | 0,0340654876                | 0,0340654876                                           |
| 5,7028904467  | 0,0169369985      | 0,0182152625                                 | 0,0110201051                | 0,0118518112                                           |
| 10,3215136816 | 0,0013148840      | 0,0022845641                                 | 0,0004935431                | 0,0010047127                                           |
| 13,4184281030 | 0,0002491644      | 0,0007101185                                 | 0,0002242059                | 0,0005877859                                           |
| 5,7881135182  | 0,0161348946      | 0,0180331175                                 | 0,0104126534                | 0,0115932359                                           |
| 21,9973707902 | 0,0000027302      | 0,0000485706                                 | 0,0000040418                | 0,0000592545                                           |
| 7,9576927880  | 0,0047883414      | 0,0061704021                                 | 0,0033217325                | 0,0042501311                                           |
| 13,1649065383 | 0,0002852410      | 0,0007742256                                 | 0,0002798500                | 0,0006935414                                           |
| 9,4382112212  | 0,0021251066      | 0,0031059251                                 | 0,0008364602                | 0,0015380074                                           |
| 12,5616371816 | 0,0003937466      | 0,0009816221                                 | 0,0003068178                | 0,0007286922                                           |
| 7,9265831915  | 0,0048713701      | 0,0061704021                                 | 0,0033553666                | 0,0042501311                                           |
| 28,9656492186 | 0,0000000737      | 0,0000041994                                 | 0,0000001499                | 0,0000085421                                           |
| 9,4651545368  | 0,0020941179      | 0,0031059251                                 | 0,0015778364                | 0,0023667546                                           |
| 4,3308168797  | 0,0374282791      | 0,0387893075                                 | 0,0231318459                | 0,0239730039                                           |
| 10,2989277339 | 0,0013310753      | 0,0022845641                                 | 0,0010384652                | 0,0017051200                                           |
| 14,1318324627 | 0,0001704351      | 0,0006939143                                 | 0,0001559338                | 0,0005348866                                           |
| 11,0919685290 | 0,0008670240      | 0,0017650131                                 | 0,0007137438                | 0,0013757149                                           |
| 12,3569821168 | 0,0004393403      | 0,0009988809                                 | 0,0001443312                | 0,0005348866                                           |
| 12,4710189651 | 0,0004133146      | 0,0009816221                                 | 0,0003529652                | 0,0007941895                                           |
| 16,3922533403 | 0,0000514953      | 0,0003261366                                 | 0,0000540109                | 0,0003420691                                           |
| 13,6645611921 | 0,0002185400      | 0,0007101185                                 | 0,0002082674                | 0,0005877859                                           |
| 12,5030152191 | 0,0004062958      | 0,0009816221                                 | 0,0003736318                | 0,0007941895                                           |
| 9,6564791569  | 0,0018868490      | 0,0029875110                                 | 0,0014851626                | 0,0022879531                                           |
| 4,5620880621  | 0,0326871982      | 0,0345031536                                 | 0,0197480219                | 0,0208451343                                           |
| 6,9707108930  | 0,0082854574      | 0,0098389807                                 | 0,0055990507                | 0,0066488727                                           |
| 10,2021074580 | 0,0014028025      | 0,0022845641                                 | 0,0011125740                | 0,0017615755                                           |
| 14,8195401325 | 0,0001183033      | 0,0005619409                                 | 0,0001111366                | 0,0004872912                                           |
| 10,5390135780 | 0,0011688078      | 0,0022207349                                 | 0,0009110236                | 0,0016227608                                           |
| 23,3284707233 | 0,0000013656      | 0,0000389206                                 | 0,0000018364                | 0,0000523387                                           |
| 15,7381000785 | 0,0000727441      | 0,0004146414                                 | 0,0000725153                | 0,0004133371                                           |
| 7,0720880617  | 0,0078293959      | 0,0094952248                                 | 0,0052907387                | 0,0064164277                                           |
| 9,1679847138  | 0,0024628563      | 0,0034239709                                 | 0,0018215800                | 0,0025324405                                           |
| 21,5716876066 | 0,0000034085      | 0,0000485706                                 | 0,0000041582                | 0,0000592545                                           |
| 6,7181613163  | 0,0095435968      | 0,0111017350                                 | 0,0061758149                | 0,0071841112                                           |
| 17,6098233614 | 0,0000271184      | 0,0001932186                                 | 0,0000302155                | 0,0002152855                                           |
| 13,9075037655 | 0,0001920303      | 0,0007084321                                 | 0,0001689116                | 0,0005348866                                           |
| 13,5216342157 | 0,0002358290      | 0,0007101185                                 | 0,0000799658                | 0,0004143685                                           |
| 20,3711268612 | 0,0000063785      | 0,0000519392                                 | 0,0000074933                | 0,0000610167                                           |
| 12,2523989834 | 0,0004646604      | 0,0009988809                                 | 0,0003761950                | 0,0007941895                                           |
| 5,7411434700  | 0,0165720004      | 0,0181654619                                 | 0,0105762853                | 0,0115932359                                           |

# Haploinsufficient

|               |              |              |              |              |
|---------------|--------------|--------------|--------------|--------------|
| 14,9723067477 | 0,0001091006 | 0,0005619409 | 0,0000967950 | 0,0004597765 |
| 6,4307050341  | 0,0112164047 | 0,0127867014 | 0,0075230389 | 0,0085762644 |
| 9,4903784786  | 0,0020655221 | 0,0031059251 | 0,0016270635 | 0,0023780158 |
| 9,0967994609  | 0,0025605717 | 0,0034750615 | 0,0019291005 | 0,0026180649 |
| 21,1016440984 | 0,0000043555 | 0,0000496532 | 0,0000056708 | 0,0000610167 |
| 13,4996159692 | 0,0002386123 | 0,0007101185 | 0,0002268647 | 0,0005877859 |
| 10,3726061715 | 0,0012789887 | 0,0022845641 | 0,0010109007 | 0,0017051200 |
| 13,8418423699 | 0,0001988581 | 0,0007084321 | 0,0001912887 | 0,0005738661 |
| 10,9002737974 | 0,0009615005 | 0,0018898458 | 0,0007240605 | 0,0013757149 |
| 8,7252644021  | 0,0031383056 | 0,0041600795 | 0,0021639893 | 0,0028685439 |
| 20,7316023375 | 0,0000052837 | 0,0000501949 | 0,0000067116 | 0,0000610167 |
| 9,3027989029  | 0,0022880403 | 0,0032604575 | 0,0017167394 | 0,0024463536 |
| 28,96565      | 0,05760      | 0,05760      | 0,03407      | 0,03407      |
| 3,60506491    | 0,00000007   | 0,00000420   | 0,00000015   | 0,00000854   |
| 11,89211      | 0,00559      | 0,00637      | 0,00352      | 0,00407      |

**Comparison between tripli or more  
copies and dupli or less copies**

| <b>Hypergeometric<br/>test<br/>p-value</b> | <b>Hypergeometric<br/>test FDR<br/>(Benjamini-<br/>Hochberg<br/>procedure)</b> |
|--------------------------------------------|--------------------------------------------------------------------------------|
| 0,8405420446                               | 0,9977290843                                                                   |
| 0,8465903628                               | 0,9977290843                                                                   |
| <b>0,0000004878</b>                        | <b>0,0000092687</b>                                                            |
| 0,7419100984                               | 0,9977290843                                                                   |
| 0,9416467713                               | 0,9977290843                                                                   |
| 0,9900214941                               | 0,9977290843                                                                   |
| 0,9238422923                               | 0,9977290843                                                                   |
| <b>0,0000003194</b>                        | <b>0,0000091022</b>                                                            |
| 0,4502664310                               | 0,9977290843                                                                   |
| 0,4850482528                               | 0,9977290843                                                                   |
| 0,9977290843                               | 0,9977290843                                                                   |
| 0,9136706806                               | 0,9977290843                                                                   |
| 0,8962819500                               | 0,9977290843                                                                   |
| <b>0,0000713147</b>                        | <b>0,0008129874</b>                                                            |
| 0,6140214247                               | 0,9977290843                                                                   |
| 0,6551854774                               | 0,9977290843                                                                   |
| 0,8811426208                               | 0,9977290843                                                                   |
| 0,9403476032                               | 0,9977290843                                                                   |
| 0,9356512805                               | 0,9977290843                                                                   |
| 0,9971380494                               | 0,9977290843                                                                   |
| 0,7612433867                               | 0,9977290843                                                                   |
| 0,1458988969                               | 0,9977290843                                                                   |
| <b>0,0000000002</b>                        | <b>0,0000000132</b>                                                            |
| 0,6634619857                               | 0,9977290843                                                                   |
| 0,8345244581                               | 0,9977290843                                                                   |
| 0,9278126172                               | 0,9977290843                                                                   |
| 0,7799939293                               | 0,9977290843                                                                   |
| 0,8916808704                               | 0,9977290843                                                                   |
| 0,9368565868                               | 0,9977290843                                                                   |
| 0,9950670394                               | 0,9977290843                                                                   |
| 0,9906273482                               | 0,9977290843                                                                   |
| 0,6188397823                               | 0,9977290843                                                                   |
| 0,6256966388                               | 0,9977290843                                                                   |
| 0,9229924282                               | 0,9977290843                                                                   |
| 0,4226425927                               | 0,9977290843                                                                   |
| 0,8656110427                               | 0,9977290843                                                                   |
| 0,9722945232                               | 0,9977290843                                                                   |
| 0,8869896982                               | 0,9977290843                                                                   |
| 0,6147665639                               | 0,9977290843                                                                   |
| 0,9689223674                               | 0,9977290843                                                                   |
| 0,5480569810                               | 0,9977290843                                                                   |
| <b>0,0000267848</b>                        | <b>0,0003816837</b>                                                            |
| 0,8137519881                               | 0,9977290843                                                                   |
| 0,5992324073                               | 0,9977290843                                                                   |
| 0,4337543415                               | 0,9977290843                                                                   |

# Haploinsufficient

|              |              |
|--------------|--------------|
| 0,3075823245 | 0,9977290843 |
| 0,9777122354 | 0,9977290843 |
| 0,8308546122 | 0,9977290843 |
| 0,8846251972 | 0,9977290843 |
| 0,2567840545 | 0,9977290843 |
| 0,3312017859 | 0,9977290843 |
| 0,3383605328 | 0,9977290843 |
| 0,6817055866 | 0,9977290843 |
| 0,8659999059 | 0,9977290843 |
| 0,7765715194 | 0,9977290843 |
| 0,9244591043 | 0,9977290843 |
| 0,9736627946 | 0,9977290843 |

|            |            |
|------------|------------|
| 0,99773    | 0,99773    |
| 0,00000000 | 0,00000001 |
| 0,69160    | 0,91023    |
