# Supplementary material for: Genes Encoding Teleost Orthologs of Human Haploinsufficient and Monoallelically Expressed Genes Remain in Duplicate More Frequently Than the Whole Genome
Source: Hindawi journal article supplement (doi:10.1155/2021/9028667), 2021-07-29
Supplement: f1 [file 9028667.f1.zip]

Parental imprinting

| Species                 | Genome                            |                                      |                                                     |                          |
|-------------------------|-----------------------------------|--------------------------------------|-----------------------------------------------------|--------------------------|
|                         | Number of<br>single copy<br>genes | Number of<br>duplicate<br>copy genes | Number of<br>triplicate<br>or more<br>copy<br>genes | Total number<br>of genes |
| Amazon molly            | 10313                             | 2909                                 | 712                                                 | 13934                    |
| Atlantic herring        | 10198                             | 2818                                 | 624                                                 | 13640                    |
| Atlantic salmon         | 3919                              | 6418                                 | 4147                                                | 14484                    |
| Ballan wrasse           | 9759                              | 3130                                 | 1027                                                | 13916                    |
| Barramundi perch        | 10123                             | 3089                                 | 836                                                 | 14048                    |
| Blue tilapia            | 10480                             | 2910                                 | 651                                                 | 14041                    |
| Blunt-snouted clingfish | 10139                             | 2552                                 | 549                                                 | 13240                    |
| Brown trout             | 3744                              | 7066                                 | 3816                                                | 14626                    |
| Burton's mouthbrooder   | 10678                             | 2836                                 | 514                                                 | 14028                    |
| Channel bull blenny     | 10109                             | 2678                                 | 517                                                 | 13304                    |
| Channel catfish         | 10868                             | 2672                                 | 590                                                 | 14130                    |
| Climbing perch          | 10638                             | 2979                                 | 540                                                 | 14157                    |
| Cod                     | 10411                             | 2323                                 | 379                                                 | 13113                    |
| Common carp             | 3530                              | 5699                                 | 4772                                                | 14001                    |
| Denticle herring        | 9916                              | 3182                                 | 798                                                 | 13896                    |
| Eastern happy           | 10464                             | 2865                                 | 713                                                 | 14042                    |
| Electric eel            | 10526                             | 2973                                 | 513                                                 | 14012                    |
| European seabass        | 10503                             | 2861                                 | 442                                                 | 13806                    |
| Fugu                    | 10133                             | 2549                                 | 576                                                 | 13258                    |
| Gilthead seabream       | 10711                             | 2870                                 | 495                                                 | 14076                    |
| Greater amberjack       | 10750                             | 2957                                 | 552                                                 | 14259                    |
| Guppy                   | 10623                             | 2662                                 | 509                                                 | 13794                    |
| Huchen                  | 3797                              | 6234                                 | 4510                                                | 14541                    |
| Indian glassy fish      | 10440                             | 2833                                 | 556                                                 | 13829                    |
| Indian medaka           | 10589                             | 2798                                 | 531                                                 | 13918                    |
| Japanese medaka HdrR    | 10699                             | 2557                                 | 474                                                 | 13730                    |
| Japanese medaka HNI     | 10528                             | 2432                                 | 426                                                 | 13386                    |
| Japanese medaka HSOK    | 10609                             | 2563                                 | 455                                                 | 13627                    |
| Jewelled blenny         | 9907                              | 2882                                 | 881                                                 | 13670                    |
| Large yellow croaker    | 10645                             | 2916                                 | 464                                                 | 14025                    |
| Live sharksucker        | 10656                             | 2761                                 | 422                                                 | 13839                    |
| Lyretail cichlid        | 10331                             | 2816                                 | 640                                                 | 13787                    |
| Makobe Island cichlid   | 10552                             | 2881                                 | 537                                                 | 13970                    |
| Mexican tetra           | 10464                             | 3139                                 | 621                                                 | 14224                    |
| Midas cichlid           | 10441                             | 2761                                 | 595                                                 | 13797                    |
| Mummichog               | 10489                             | 2813                                 | 553                                                 | 13855                    |
| Nile tilapia            | 10588                             | 2803                                 | 574                                                 | 13965                    |
| Northern pike           | 10447                             | 3354                                 | 462                                                 | 14263                    |
| Orbiculate cardinalfish | 10081                             | 2994                                 | 797                                                 | 13872                    |
| Pachon cavefish         | 10333                             | 2844                                 | 497                                                 | 13674                    |
| Pinecone soldierfish    | 10486                             | 3042                                 | 553                                                 | 14081                    |
| Rainbow trout           | 4274                              | 6304                                 | 3445                                                | 14023                    |
| Red-bellied piranha     | 10767                             | 3201                                 | 589                                                 | 14557                    |
| Sailfin molly           | 10238                             | 2843                                 | 780                                                 | 13861                    |
| Sheepshead minnow       | 10388                             | 2800                                 | 597                                                 | 13785                    |

# Parental imprinting

|                       |            |            |           |             |
|-----------------------|------------|------------|-----------|-------------|
| Shortfin molly        | 10174      | 2962       | 780       | 13916       |
| Siamese fighting fish | 10663      | 2637       | 432       | 13732       |
| Stickleback           | 10384      | 2474       | 337       | 13195       |
| Swamp eel             | 10771      | 2672       | 512       | 13955       |
| Tetraodon             | 9699       | 2576       | 643       | 12918       |
| Tiger tail seahorse   | 10485      | 2519       | 512       | 13516       |
| Tongue sole           | 10473      | 2615       | 555       | 13643       |
| Turbot                | 10755      | 2757       | 340       | 13852       |
| Yellowtail amberjack  | 10347      | 3084       | 735       | 14166       |
| Zebra mbuna           | 10262      | 3037       | 831       | 14130       |
| Zebrafish             | 10601      | 2942       | 552       | 14095       |
| Zig-zag eel           | 10768      | 2867       | 431       | 14066       |
|                       |            |            |           |             |
| <b>MAXIMAL</b>        | 10868      | 7066       | 4772      | 14626       |
| <b>MINIMAL</b>        | 3530       | 2323       | 337       | 12918       |
| <b>MOYENNE</b>        | 9853,78947 | 3135,28070 | 892,82456 | 13881,89474 |

# Parental imprinting

## Parental imprinting genes

| Number of parental<br>imprinting teleost<br>orthologs returned<br>in singleton | Number of parental<br>imprinting teleost<br>orthologs remained<br>in duplicate | Number of parental<br>imprinting teleost<br>orthologs remained<br>in triplicate or more | Total number of<br>parental imprinting<br>genes |
|--------------------------------------------------------------------------------|--------------------------------------------------------------------------------|-----------------------------------------------------------------------------------------|-------------------------------------------------|
| 40                                                                             | 7                                                                              | 1                                                                                       | 48                                              |
| 36                                                                             | 5                                                                              | 2                                                                                       | 43                                              |
| 15                                                                             | 20                                                                             | 12                                                                                      | 47                                              |
| 35                                                                             | 7                                                                              | 3                                                                                       | 45                                              |
| 40                                                                             | 5                                                                              | 3                                                                                       | 48                                              |
| 38                                                                             | 8                                                                              | 1                                                                                       | 47                                              |
| 33                                                                             | 7                                                                              | 2                                                                                       | 42                                              |
| 14                                                                             | 22                                                                             | 11                                                                                      | 47                                              |
| 37                                                                             | 9                                                                              | 1                                                                                       | 47                                              |
| 39                                                                             | 8                                                                              | 0                                                                                       | 47                                              |
| 35                                                                             | 10                                                                             | 3                                                                                       | 48                                              |
| 40                                                                             | 7                                                                              | 0                                                                                       | 47                                              |
| 35                                                                             | 6                                                                              | 0                                                                                       | 41                                              |
| 12                                                                             | 23                                                                             | 14                                                                                      | 49                                              |
| 34                                                                             | 10                                                                             | 4                                                                                       | 48                                              |
| 40                                                                             | 7                                                                              | 0                                                                                       | 47                                              |
| 36                                                                             | 6                                                                              | 2                                                                                       | 44                                              |
| 37                                                                             | 5                                                                              | 3                                                                                       | 45                                              |
| 31                                                                             | 11                                                                             | 2                                                                                       | 44                                              |
| 38                                                                             | 7                                                                              | 1                                                                                       | 46                                              |
| 35                                                                             | 9                                                                              | 1                                                                                       | 45                                              |
| 36                                                                             | 7                                                                              | 3                                                                                       | 46                                              |
| 12                                                                             | 15                                                                             | 20                                                                                      | 47                                              |
| 40                                                                             | 5                                                                              | 3                                                                                       | 48                                              |
| 38                                                                             | 5                                                                              | 4                                                                                       | 47                                              |
| 38                                                                             | 3                                                                              | 5                                                                                       | 46                                              |
| 39                                                                             | 3                                                                              | 3                                                                                       | 45                                              |
| 37                                                                             | 4                                                                              | 4                                                                                       | 45                                              |
| 35                                                                             | 6                                                                              | 4                                                                                       | 45                                              |
| 40                                                                             | 7                                                                              | 0                                                                                       | 47                                              |
| 36                                                                             | 6                                                                              | 2                                                                                       | 44                                              |
| 38                                                                             | 6                                                                              | 2                                                                                       | 46                                              |
| 37                                                                             | 8                                                                              | 2                                                                                       | 47                                              |
| 37                                                                             | 6                                                                              | 3                                                                                       | 46                                              |
| 36                                                                             | 7                                                                              | 2                                                                                       | 45                                              |
| 38                                                                             | 8                                                                              | 1                                                                                       | 47                                              |
| 36                                                                             | 10                                                                             | 0                                                                                       | 46                                              |
| 37                                                                             | 8                                                                              | 1                                                                                       | 46                                              |
| 36                                                                             | 8                                                                              | 3                                                                                       | 47                                              |
| 34                                                                             | 7                                                                              | 2                                                                                       | 43                                              |
| 41                                                                             | 5                                                                              | 2                                                                                       | 48                                              |
| 16                                                                             | 19                                                                             | 10                                                                                      | 45                                              |
| 38                                                                             | 9                                                                              | 1                                                                                       | 48                                              |
| 37                                                                             | 8                                                                              | 1                                                                                       | 46                                              |
| 39                                                                             | 8                                                                              | 0                                                                                       | 47                                              |

Parental imprinting

|          |         |         |          |
|----------|---------|---------|----------|
| 39       | 8       | 1       | 48       |
| 38       | 7       | 1       | 46       |
| 34       | 6       | 0       | 40       |
| 36       | 6       | 1       | 43       |
| 32       | 5       | 2       | 39       |
| 38       | 7       | 2       | 47       |
| 35       | 7       | 2       | 44       |
| 37       | 7       | 0       | 44       |
| 38       | 7       | 2       | 47       |
| 39       | 8       | 0       | 47       |
| 38       | 8       | 0       | 46       |
| 38       | 7       | 1       | 46       |
|          |         |         |          |
| 41       | 23      | 20      | 49       |
| 12       | 3       | 0       | 39       |
| 34,96491 | 8,07018 | 2,73684 | 45,77193 |

# Parental imprinting

## Comparison between singleton, duplicate, triplicate and more copies

| Chi2 test     | Chi2 test p-value | Chi2 test FDR<br>(Benjamini-Hochberg<br>procedure) | Hypergeometric<br>test<br>p-value | Hypergeometric<br>test FDR<br>(Benjamini-Hochberg<br>procedure) |
|---------------|-------------------|----------------------------------------------------|-----------------------------------|-----------------------------------------------------------------|
| 2,16781931652 | 0,14092594834     | 0,64434095476                                      | 0,9552571332                      | 0,9775683169                                                    |
| 1,82790798273 | 0,17637484410     | 0,64434095476                                      | 0,9430909017                      | 0,9775683169                                                    |
| 0,56188439137 | 0,45350198755     | 0,65460543338                                      | 0,8211496266                      | 0,9775683169                                                    |
| 1,25708265097 | 0,26220402818     | 0,64434095476                                      | 0,9039127911                      | 0,9775683169                                                    |
| 3,02984136732 | 0,08174600839     | 0,64434095476                                      | 0,9766520190                      | 0,9775683169                                                    |
| 0,95828398003 | 0,32761960679     | 0,64434095476                                      | 0,8769631780                      | 0,9775683169                                                    |
| 0,09300153399 | 0,76039545311     | 0,81778378919                                      | 0,6779087930                      | 0,9775683169                                                    |
| 0,43303391380 | 0,51050399575     | 0,66197116796                                      | 0,7982018729                      | 0,9775683169                                                    |
| 0,17535090386 | 0,67539942470     | 0,76995534416                                      | 0,7157423413                      | 0,9775683169                                                    |
| 1,25991609315 | 0,26166697361     | 0,64434095476                                      | 0,9068013864                      | 0,9775683169                                                    |
| 0,43202846256 | 0,51099528755     | 0,66197116796                                      | 0,3051302264                      | 0,9775683169                                                    |
| 2,49787865671 | 0,11399976162     | 0,64434095476                                      | 0,9664453344                      | 0,9775683169                                                    |
| 0,89362774798 | 0,34449611238     | 0,64434095476                                      | 0,8761637799                      | 0,9775683169                                                    |
| 0,01357232029 | 0,90725604703     | 0,93583402318                                      | 0,5299965188                      | 0,9775683169                                                    |
| 0,00648137825 | 0,93583402318     | 0,93583402318                                      | 0,5224688781                      | 0,9775683169                                                    |
| 2,77440861278 | 0,09578202804     | 0,64434095476                                      | 0,9728418984                      | 0,9775683169                                                    |
| 1,05585496674 | 0,30416247840     | 0,64434095476                                      | 0,8889297788                      | 0,9775683169                                                    |
| 0,93410700615 | 0,33379799117     | 0,64434095476                                      | 0,8760501929                      | 0,9775683169                                                    |
| 0,87189565398 | 0,35043104557     | 0,64434095476                                      | 0,2204489022                      | 0,9775683169                                                    |
| 1,07320185620 | 0,30022334069     | 0,64434095476                                      | 0,8904645906                      | 0,9775683169                                                    |
| 0,13817505816 | 0,71010203388     | 0,77838107560                                      | 0,6997915280                      | 0,9775683169                                                    |
| 0,04054215977 | 0,84042425385     | 0,88711449018                                      | 0,6364183444                      | 0,9775683169                                                    |
| 0,00820767112 | 0,92781345293     | 0,93583402318                                      | 0,5405664371                      | 0,9775683169                                                    |
| 1,59463492247 | 0,20666518063     | 0,64434095476                                      | 0,9294644628                      | 0,9775683169                                                    |
| 0,58758462806 | 0,44335465091     | 0,65460543338                                      | 0,8253785111                      | 0,9775683169                                                    |
| 0,58679384563 | 0,44366160367     | 0,65460543338                                      | 0,8270443176                      | 0,9775683169                                                    |
| 1,72252582204 | 0,18936824063     | 0,64434095476                                      | 0,9399710719                      | 0,9775683169                                                    |
| 0,49827478158 | 0,48025915058     | 0,66197116796                                      | 0,8105351216                      | 0,9775683169                                                    |
| 0,63486054702 | 0,42557801838     | 0,65460543338                                      | 0,8324675544                      | 0,9775683169                                                    |
| 2,17772225096 | 0,14002155581     | 0,64434095476                                      | 0,9569529489                      | 0,9775683169                                                    |
| 0,57681519451 | 0,44756337761     | 0,65460543338                                      | 0,8256018817                      | 0,9775683169                                                    |
| 1,44287002784 | 0,22967547166     | 0,64434095476                                      | 0,9201187661                      | 0,9775683169                                                    |
| 0,25881980135 | 0,61093212875     | 0,72548190289                                      | 0,7463421428                      | 0,9775683169                                                    |
| 1,11609210523 | 0,29076148354     | 0,64434095476                                      | 0,8929666713                      | 0,9775683169                                                    |
| 0,45710393917 | 0,49898057037     | 0,66197116796                                      | 0,8003237380                      | 0,9775683169                                                    |
| 0,67658916138 | 0,41076371424     | 0,65460543338                                      | 0,8401159253                      | 0,9775683169                                                    |
| 0,14971102162 | 0,69881166945     | 0,77838107560                                      | 0,7048683344                      | 0,9775683169                                                    |
| 1,21326465503 | 0,27068652780     | 0,64434095476                                      | 0,9015110232                      | 0,9775683169                                                    |
| 0,36443122889 | 0,54605548469     | 0,69167028061                                      | 0,7757330661                      | 0,9775683169                                                    |
| 0,28578312270 | 0,59293556417     | 0,71909206718                                      | 0,7571928030                      | 0,9775683169                                                    |
| 3,02573776814 | 0,08195303977     | 0,64434095476                                      | 0,9775683169                      | 0,9775683169                                                    |
| 0,54742382152 | 0,45937223395     | 0,65460543338                                      | 0,8178773850                      | 0,9775683169                                                    |
| 0,67458032455 | 0,41145924068     | 0,65460543338                                      | 0,8382927611                      | 0,9775683169                                                    |
| 1,02937426257 | 0,31030568071     | 0,64434095476                                      | 0,8845732874                      | 0,9775683169                                                    |
| 1,47014183203 | 0,22532331714     | 0,64434095476                                      | 0,9218802658                      | 0,9775683169                                                    |

Parental imprinting

|               |               |               |              |              |
|---------------|---------------|---------------|--------------|--------------|
| 1,61775914166 | 0,20340452658 | 0,64434095476 | 0,9293912446 | 0,9775683169 |
| 0,65155924326 | 0,41955576048 | 0,65460543338 | 0,8379398246 | 0,9775683169 |
| 0,94802564449 | 0,33022236217 | 0,64434095476 | 0,8823911840 | 0,9775683169 |
| 1,04345241940 | 0,30701988770 | 0,64434095476 | 0,8896693332 | 0,9775683169 |
| 1,01268132802 | 0,31426133166 | 0,64434095476 | 0,8869704490 | 0,9775683169 |
| 0,29001278198 | 0,59021233940 | 0,71909206718 | 0,7574096448 | 0,9775683169 |
| 0,19075931073 | 0,66228539982 | 0,76995534416 | 0,7241481690 | 0,9775683169 |
| 1,05406939974 | 0,30457172561 | 0,64434095476 | 0,8906432257 | 0,9775683169 |
| 1,45588817316 | 0,22758549021 | 0,64434095476 | 0,9194995633 | 0,9775683169 |
| 2,53398985696 | 0,11141816997 | 0,64434095476 | 0,9661604630 | 0,9775683169 |
| 1,35021591209 | 0,24524037432 | 0,64434095476 | 0,9136819094 | 0,9775683169 |
| 0,93969157572 | 0,33235717311 | 0,64434095476 | 0,8765769657 | 0,9775683169 |

|         |         |         |         |         |
|---------|---------|---------|---------|---------|
| 3,02984 | 0,93583 | 0,93583 | 0,97757 | 0,97757 |
| 0,00648 | 0,08175 | 0,64434 | 0,22045 | 0,97757 |
| 0,99444 | 0,39979 | 0,68383 | 0,81934 | 0,97757 |

**Comparison between tripli or more  
copies and dupli or less copies**

| <b>Hypergeometric<br/>test<br/>p-value</b> | <b>Hypergeometric<br/>test FDR<br/>(Benjamini-<br/>Hochberg<br/>procedure)</b> |
|--------------------------------------------|--------------------------------------------------------------------------------|
| 0,91969788372                              | 1,00000000000                                                                  |
| 0,59167155691                              | 1,00000000000                                                                  |
| 0,73161853524                              | 1,00000000000                                                                  |
| 0,65528084479                              | 1,00000000000                                                                  |
| 0,55040331717                              | 1,00000000000                                                                  |
| 0,89300832430                              | 1,00000000000                                                                  |
| 0,52468586208                              | 1,00000000000                                                                  |
| 0,71496448977                              | 1,00000000000                                                                  |
| 0,82750852911                              | 1,00000000000                                                                  |
| 1,00000000000                              | 1,00000000000                                                                  |
| 0,32443885186                              | 1,00000000000                                                                  |
| 1,00000000000                              | 1,00000000000                                                                  |
| 1,00000000000                              | 1,00000000000                                                                  |
| 0,83283033066                              | 1,00000000000                                                                  |
| 0,29658562524                              | 1,00000000000                                                                  |
| 1,00000000000                              | 1,00000000000                                                                  |
| 0,48254549653                              | 1,00000000000                                                                  |
| 0,17389424576                              | 1,00000000000                                                                  |
| 0,57567927026                              | 1,00000000000                                                                  |
| 0,80784657953                              | 1,00000000000                                                                  |
| 0,83127338931                              | 1,00000000000                                                                  |
| 0,24038774061                              | 1,00000000000                                                                  |
| 0,06267636237                              | 1,00000000000                                                                  |
| 0,30386035497                              | 1,00000000000                                                                  |
| 0,10347346240                              | 1,00000000000                                                                  |
| <b>0,02056074564</b>                       | 1,00000000000                                                                  |
| 0,17176571598                              | 1,00000000000                                                                  |
| 0,06243174860                              | 1,00000000000                                                                  |
| 0,32950431769                              | 1,00000000000                                                                  |
| 1,00000000000                              | 1,00000000000                                                                  |
| 0,38990662355                              | 1,00000000000                                                                  |
| 0,63666567736                              | 1,00000000000                                                                  |
| 0,54422489405                              | 1,00000000000                                                                  |
| 0,32555884824                              | 1,00000000000                                                                  |
| 0,58388595259                              | 1,00000000000                                                                  |
| 0,85304731505                              | 1,00000000000                                                                  |
| 1,00000000000                              | 1,00000000000                                                                  |
| 0,78065500981                              | 1,00000000000                                                                  |
| 0,51181036217                              | 1,00000000000                                                                  |
| 0,46668689685                              | 1,00000000000                                                                  |
| 0,56749771847                              | 1,00000000000                                                                  |
| 0,69752313276                              | 1,00000000000                                                                  |
| 0,86273168483                              | 1,00000000000                                                                  |
| 0,93065813259                              | 1,00000000000                                                                  |
| 1,00000000000                              | 1,00000000000                                                                  |

# Parental imprinting

|               |               |
|---------------|---------------|
| 0,93756281335 | 1,00000000000 |
| 0,77072573312 | 1,00000000000 |
| 1,00000000000 | 1,00000000000 |
| 0,80006867679 | 1,00000000000 |
| 0,58493909878 | 1,00000000000 |
| 0,53622892310 | 1,00000000000 |
| 0,53943407033 | 1,00000000000 |
| 1,00000000000 | 1,00000000000 |
| 0,70849660857 | 1,00000000000 |
| 1,00000000000 | 1,00000000000 |
| 1,00000000000 | 1,00000000000 |
| 0,76161660669 | 1,00000000000 |

|         |         |
|---------|---------|
| 1,00000 | 1,00000 |
| 0,02056 | 1,00000 |
| 0,64594 | 1,00000 |
