# Supplementary material for: Genes Encoding Teleost Orthologs of Human Haploinsufficient and Monoallelically Expressed Genes Remain in Duplicate More Frequently Than the Whole Genome
Source: Hindawi journal article supplement (doi:10.1155/2021/9028667), 2021-07-29
Supplement: f1 [file 9028667.f1.zip]

# Monoallelic

|                         | Genome                      |                                |                                         |                       |                                                               |
|-------------------------|-----------------------------|--------------------------------|-----------------------------------------|-----------------------|---------------------------------------------------------------|
| Species                 | Number of single copy genes | Number of duplicate copy genes | Number of triplicate or more copy genes | Total number of genes | Number of monoallelic teleost orthologs returned in singleton |
| Amazon molly            | 10313                       | 2909                           | 712                                     | 13934                 | 271                                                           |
| Atlantic herring        | 10198                       | 2818                           | 624                                     | 13640                 | 285                                                           |
| Atlantic salmon         | 3919                        | 6418                           | 4147                                    | 14484                 | 105                                                           |
| Ballan wrasse           | 9759                        | 3130                           | 1027                                    | 13916                 | 270                                                           |
| Barramundi perch        | 10123                       | 3089                           | 836                                     | 14048                 | 279                                                           |
| Blue tilapia            | 10480                       | 2910                           | 651                                     | 14041                 | 275                                                           |
| Blunt-snouted clingfish | 10139                       | 2552                           | 549                                     | 13240                 | 272                                                           |
| Brown trout             | 3744                        | 7066                           | 3816                                    | 14626                 | 101                                                           |
| Burton's mouthbrooder   | 10678                       | 2836                           | 514                                     | 14028                 | 283                                                           |
| Channel bull blenny     | 10109                       | 2678                           | 517                                     | 13304                 | 272                                                           |
| Channel catfish         | 10868                       | 2672                           | 590                                     | 14130                 | 296                                                           |
| Climbing perch          | 10638                       | 2979                           | 540                                     | 14157                 | 287                                                           |
| Cod                     | 10411                       | 2323                           | 379                                     | 13113                 | 288                                                           |
| Common carp             | 3530                        | 5699                           | 4772                                    | 14001                 | 87                                                            |
| Denticle herring        | 9916                        | 3182                           | 798                                     | 13896                 | 265                                                           |
| Eastern happy           | 10464                       | 2865                           | 713                                     | 14042                 | 282                                                           |
| Electric eel            | 10526                       | 2973                           | 513                                     | 14012                 | 290                                                           |
| European seabass        | 10503                       | 2861                           | 442                                     | 13806                 | 286                                                           |
| Fugu                    | 10133                       | 2549                           | 576                                     | 13258                 | 262                                                           |
| Gilthead seabream       | 10711                       | 2870                           | 495                                     | 14076                 | 278                                                           |
| Greater amberjack       | 10750                       | 2957                           | 552                                     | 14259                 | 285                                                           |
| Guppy                   | 10623                       | 2662                           | 509                                     | 13794                 | 289                                                           |
| Huchen                  | 3797                        | 6234                           | 4510                                    | 14541                 | 102                                                           |
| Indian glassy fish      | 10440                       | 2833                           | 556                                     | 13829                 | 276                                                           |
| Indian medaka           | 10589                       | 2798                           | 531                                     | 13918                 | 279                                                           |
| Japanese medaka HdrR    | 10699                       | 2557                           | 474                                     | 13730                 | 293                                                           |
| Japanese medaka HNI     | 10528                       | 2432                           | 426                                     | 13386                 | 292                                                           |
| Japanese medaka HSOK    | 10609                       | 2563                           | 455                                     | 13627                 | 286                                                           |
| Jewelled blenny         | 9907                        | 2882                           | 881                                     | 13670                 | 268                                                           |
| Large yellow croaker    | 10645                       | 2916                           | 464                                     | 14025                 | 288                                                           |
| Live sharksucker        | 10656                       | 2761                           | 422                                     | 13839                 | 284                                                           |
| Lyretail cichlid        | 10331                       | 2816                           | 640                                     | 13787                 | 282                                                           |
| Makobe Island cichlid   | 10552                       | 2881                           | 537                                     | 13970                 | 290                                                           |
| Mexican tetra           | 10464                       | 3139                           | 621                                     | 14224                 | 280                                                           |
| Midas cichlid           | 10441                       | 2761                           | 595                                     | 13797                 | 281                                                           |
| Mummichog               | 10489                       | 2813                           | 553                                     | 13855                 | 284                                                           |
| Nile tilapia            | 10588                       | 2803                           | 574                                     | 13965                 | 277                                                           |
| Northern pike           | 10447                       | 3354                           | 462                                     | 14263                 | 272                                                           |
| Orbiculate cardinalfish | 10081                       | 2994                           | 797                                     | 13872                 | 271                                                           |
| Pachon cavefish         | 10333                       | 2844                           | 497                                     | 13674                 | 296                                                           |
| Pinecone soldierfish    | 10486                       | 3042                           | 553                                     | 14081                 | 288                                                           |
| Rainbow trout           | 4274                        | 6304                           | 3445                                    | 14023                 | 115                                                           |
| Red-bellied piranha     | 10767                       | 3201                           | 589                                     | 14557                 | 288                                                           |
| Sailfin molly           | 10238                       | 2843                           | 780                                     | 13861                 | 266                                                           |
| Sheepshead minnow       | 10388                       | 2800                           | 597                                     | 13785                 | 286                                                           |
| Shortfin molly          | 10174                       | 2962                           | 780                                     | 13916                 | 270                                                           |

# Monoallelic

|                       |            |           |           |             |           |
|-----------------------|------------|-----------|-----------|-------------|-----------|
| Siamese fighting fish | 10663      | 2637      | 432       | 13732       | 281       |
| Stickleback           | 10384      | 2474      | 337       | 13195       | 289       |
| Swamp eel             | 10771      | 2672      | 512       | 13955       | 279       |
| Tetraodon             | 9699       | 2576      | 643       | 12918       | 270       |
| Tiger tail seahorse   | 10485      | 2519      | 512       | 13516       | 285       |
| Tongue sole           | 10473      | 2615      | 555       | 13643       | 268       |
| Turbot                | 10755      | 2757      | 340       | 13852       | 290       |
| Yellowtail amberjack  | 10347      | 3084      | 735       | 14166       | 268       |
| Zebra mbuna           | 10262      | 3037      | 831       | 14130       | 281       |
| Zebrafish             | 10601      | 2942      | 552       | 14095       | 287       |
| Zig-zag eel           | 10768      | 2867      | 431       | 14066       | 280       |
|                       |            |           |           |             |           |
| <b>MAXIMAL</b>        | 10868      | 7066      | 4772      | 14626       | 296       |
| <b>MINIMAL</b>        | 3530       | 2323      | 337       | 12918       | 87        |
| <b>MEAN</b>           | 9853.78947 | 3135.2807 | 892.82456 | 13881.89474 | 264.91228 |

## Monoallelic

| Monoallelic genes                                             |                                                                        |                                   |                  |
|---------------------------------------------------------------|------------------------------------------------------------------------|-----------------------------------|------------------|
| Number of monoallelic teleost orthologs remained in duplicate | Number of monoallelic teleost orthologs remained in triplicate or more | Total number of monoallelic genes | Chi2 test        |
| 121                                                           | 19                                                                     | 411                               | 13.9387096260202 |
| 98                                                            | 11                                                                     | 394                               | 1.23351394573779 |
| 188                                                           | 139                                                                    | 432                               | 1.65759050976307 |
| 103                                                           | 37                                                                     | 410                               | 3.57558871003738 |
| 112                                                           | 25                                                                     | 416                               | 5.15058909271909 |
| 125                                                           | 9                                                                      | 409                               | 11.8362262777822 |
| 109                                                           | 13                                                                     | 394                               | 12.4987176965819 |
| 193                                                           | 136                                                                    | 430                               | 1.00505436615535 |
| 117                                                           | 9                                                                      | 409                               | 10.7931846664825 |
| 105                                                           | 17                                                                     | 394                               | 10.4266048912999 |
| 93                                                            | 18                                                                     | 407                               | 4.01856077675943 |
| 109                                                           | 19                                                                     | 415                               | 7.96241030696846 |
| 87                                                            | 4                                                                      | 379                               | 2.68603733183254 |
| 163                                                           | 160                                                                    | 410                               | 3.46682379717688 |
| 115                                                           | 22                                                                     | 402                               | 5.81710660555946 |
| 110                                                           | 19                                                                     | 411                               | 7.55043877371843 |
| 114                                                           | 16                                                                     | 420                               | 8.29022397650593 |
| 119                                                           | 10                                                                     | 415                               | 11.6891432474081 |
| 113                                                           | 16                                                                     | 391                               | 19.2663274731695 |
| 118                                                           | 15                                                                     | 411                               | 16.1482693430771 |
| 119                                                           | 13                                                                     | 417                               | 11.1574616489647 |
| 101                                                           | 15                                                                     | 405                               | 7.31241053606669 |
| 174                                                           | 154                                                                    | 430                               | 1.27458850248621 |
| 110                                                           | 17                                                                     | 403                               | 10.6954866714656 |
| 119                                                           | 10                                                                     | 408                               | 13.289588471646  |
| 104                                                           | 11                                                                     | 408                               | 8.85583642810311 |
| 98                                                            | 10                                                                     | 400                               | 7.60235610699769 |
| 105                                                           | 11                                                                     | 402                               | 10.492657449668  |
| 115                                                           | 26                                                                     | 409                               | 9.89385319704292 |
| 109                                                           | 14                                                                     | 411                               | 7.62961968920492 |
| 112                                                           | 10                                                                     | 406                               | 11.3910847293066 |
| 108                                                           | 20                                                                     | 410                               | 8.26226773647726 |
| 109                                                           | 12                                                                     | 411                               | 5.50151857284609 |
| 130                                                           | 7                                                                      | 417                               | 8.83688604845189 |
| 112                                                           | 13                                                                     | 406                               | 9.21596000684082 |
| 115                                                           | 15                                                                     | 414                               | 11.3677683829423 |
| 115                                                           | 17                                                                     | 409                               | 14.6072058798889 |
| 130                                                           | 9                                                                      | 411                               | 10.4698042534466 |
| 120                                                           | 23                                                                     | 414                               | 10.8444762562646 |
| 102                                                           | 9                                                                      | 407                               | 1.77731856252715 |
| 114                                                           | 12                                                                     | 414                               | 5.23656265697537 |
| 187                                                           | 118                                                                    | 420                               | 1.90183328264716 |
| 126                                                           | 10                                                                     | 424                               | 8.0321791846593  |
| 118                                                           | 19                                                                     | 403                               | 12.8860231673662 |
| 113                                                           | 14                                                                     | 413                               | 8.29691752606091 |
| 115                                                           | 23                                                                     | 408                               | 9.97730787470275 |

# Monoallelic

|          |         |           |                  |
|----------|---------|-----------|------------------|
| 106      | 11      | 398       | 11.3912818606198 |
| 101      | 7       | 397       | 8.24446175422885 |
| 121      | 6       | 406       | 16.5184319794668 |
| 92       | 18      | 380       | 3.29644150913356 |
| 100      | 10      | 395       | 6.67714292991364 |
| 113      | 13      | 394       | 16.8903773302179 |
| 107      | 6       | 403       | 7.49494785386498 |
| 126      | 22      | 416       | 15.6905229960926 |
| 113      | 22      | 416       | 5.39468739044395 |
| 108      | 17      | 412       | 6.80895265218264 |
| 122      | 8       | 410       | 15.5874097052721 |
|          |         |           |                  |
| 193      | 160     | 432       | 19.26633         |
| 87       | 4       | 379       | 1.00505          |
| 117.5614 | 25.7193 | 408.19298 | 8.76868          |

## Monoallelic

## Comparison between singleton. duplicate. triplicate and more copies

| Chi2 test p-value     | Chi2 test FDR<br>(Benjamini-Hochberg<br>procedure) | Hypergeometric test<br>p-value |
|-----------------------|----------------------------------------------------|--------------------------------|
| 0.00018886860127149   | 0.00134568878405937                                | 0.000137464383867894           |
| 0.266724746147075     | 0.271487688042558                                  | 0.142965724384076              |
| 0.197928962638283     | 0.208925016118188                                  | 0.104376117577757              |
| 0.0586346618682334    | 0.0696286609685272                                 | 0.0322284554379218             |
| 0.0232384880153939    | 0.0287955177582055                                 | 0.0131983979275941             |
| 0.000580894308096017  | 0.00266224236437687                                | 0.000402737082218547           |
| 0.000407231436306382  | 0.00211019926086034                                | 0.000301752058704081           |
| 0.316090582201079     | 0.316090582201079                                  | 0.168291973747208              |
| 0.00101874467130022   | 0.00305623401390067                                | 0.000701654596899842           |
| 0.00124212871655956   | 0.00307831899321282                                | 0.000847898227353685           |
| 0.0450021009164876    | 0.054577016005102                                  | 0.0257145725186945             |
| 0.00477587727939797   | 0.00800661779193189                                | 0.00296943604770668            |
| 0.101231283926359     | 0.113140846741225                                  | 0.0568461637573481             |
| 0.0626114256052774    | 0.0728336991734859                                 | 0.0317707364061847             |
| 0.0158710321529334    | 0.0215392579218382                                 | 0.00914170841516215            |
| 0.00599954641218754   | 0.00924254447282945                                | 0.00367156367903466            |
| 0.0039859072213287    | 0.0072811316082688                                 | 0.00248731259369759            |
| 0.000628658395851695  | 0.00266224236437687                                | 0.000441640625874871           |
| 0.0000113693892700165 | 0.00064805518839094                                | 0.0000110329451590078          |
| 0.0000585720637532463 | 0.00074838526850211                                | 0.0000487343412091267          |
| 0.000836943600753705  | 0.00280622266135066                                | 0.000573052662348618           |
| 0.00684800045720776   | 0.0100086160528421                                 | 0.00428266166196166            |
| 0.258907641673038     | 0.268322465006603                                  | 0.137396732418724              |
| 0.00107397217654475   | 0.00306082070315253                                | 0.000731847894935271           |
| 0.000266884055951835  | 0.00169026568769495                                | 0.000199967136840418           |
| 0.00292153211347105   | 0.0060094774957342                                 | 0.00193655674575803            |
| 0.00582920771639041   | 0.00922957888428482                                | 0.00375053682402355            |
| 0.00119849868506232   | 0.00307831899321282                                | 0.000844168768457975           |
| 0.00165831764169393   | 0.00378096422306216                                | 0.00104757283893488            |
| 0.00574174085929846   | 0.00922957888428482                                | 0.00357274007335961            |
| 0.000737974249417222  | 0.00266224236437687                                | 0.000527605536828009           |
| 0.00404775337944835   | 0.0072811316082688                                 | 0.00253116744629472            |
| 0.0189999669939578    | 0.0251860027594324                                 | 0.0111355190117333             |
| 0.00295202403299224   | 0.0060094774957342                                 | 0.00184218830015479            |
| 0.00239914374388519   | 0.00525966128467137                                | 0.00156148171712992            |
| 0.000747296102281226  | 0.00266224236437687                                | 0.000516792581451189           |
| 0.000132407278526917  | 0.00107817355371918                                | 0.000103296208374819           |
| 0.00121341575026333   | 0.00307831899321282                                | 0.000790756986779675           |
| 0.000990909026231308  | 0.00305623401390067                                | 0.000641556215148135           |
| 0.182478936531605     | 0.196250931741538                                  | 0.0986881217365519             |
| 0.0221169316129434    | 0.0280147800430616                                 | 0.0127804679216711             |
| 0.167873259864098     | 0.184014919466416                                  | 0.0881609735128426             |
| 0.00459535187644055   | 0.0079374259683973                                 | 0.00281853107038826            |
| 0.000331045112485734  | 0.00188695714116868                                | 0.000234350502310824           |
| 0.00397124262792783   | 0.0072811316082688                                 | 0.00249262706919953            |
| 0.00158481227777903   | 0.0037639291597252                                 | 0.00101598320651583            |

# Monoallelic

|                       |                     |                       |
|-----------------------|---------------------|-----------------------|
| 0.00073789593941484   | 0.00266224236437687 | 0.000538208305466549  |
| 0.00408765283271231   | 0.0072811316082688  | 0.00269165066468724   |
| 0.0000481794330783668 | 0.00074838526850211 | 0.0000423005813864691 |
| 0.0694301408849763    | 0.0791503606088729  | 0.0388746981490364    |
| 0.00976570314494789   | 0.0135767092502934  | 0.00605247372300639   |
| 0.0000396018366304259 | 0.00074838526850211 | 0.0000352750946425042 |
| 0.00618723228566243   | 0.00928084842849364 | 0.00392687051045541   |
| 0.0000745970034529486 | 0.00074838526850211 | 0.0000558451630491113 |
| 0.0201981432735984    | 0.0261657765135251  | 0.0115694085840062    |
| 0.00907019493624454   | 0.0129250277841485  | 0.00548144181437892   |
| 0.0000787773966844327 | 0.00074838526850211 | 0.0000650920324267127 |
|                       |                     |                       |
| 0.31609               | 0.31609             | 0.16829               |
| 0.00001               | 0.00065             | 0.00001               |
| 0.0338                | 0.0378              | 0.01835               |

## Monoallelic

|                                                        | Comparison between tripli or more copies and dupli or less copies |                                                        |
|--------------------------------------------------------|-------------------------------------------------------------------|--------------------------------------------------------|
| Hypergeometric test FDR (Benjamini-Hochberg procedure) | Hypergeometric test p-value                                       | Hypergeometric test FDR (Benjamini-Hochberg procedure) |
| 0.000979433735058742                                   | 0.707690934057916                                                 | 0.999344539373478                                      |
| 0.145518683748077                                      | 0.974308363306199                                                 | 0.999344539373478                                      |
| 0.110174790776522                                      | 0.0559093356118618                                                | 0.637366425975224                                      |
| 0.0374902440808478                                     | 0.117459032564569                                                 | 0.999344539373478                                      |
| 0.0163545365624536                                     | 0.509863318505342                                                 | 0.999344539373478                                      |
| 0.0019130011405381                                     | 0.99695791187862                                                  | 0.999344539373478                                      |
| 0.00156362430419387                                    | 0.8377279944677                                                   | 0.999344539373478                                      |
| 0.168291973747208                                      | 0.00530186120487802                                               | 0.302206088678047                                      |
| 0.00208576650056552                                    | 0.966685262815658                                                 | 0.999344539373478                                      |
| 0.00210131299822435                                    | 0.363559405920082                                                 | 0.999344539373478                                      |
| 0.03118575816097                                       | 0.435330527411394                                                 | 0.999344539373478                                      |
| 0.00497817219762591                                    | 0.237484152169085                                                 | 0.999344539373478                                      |
| 0.0635339477288008                                     | 0.995745472692328                                                 | 0.999344539373478                                      |
| 0.0374902440808478                                     | 0.0190592413693036                                                | 0.362125586016768                                      |
| 0.0124066042777201                                     | 0.624673418135437                                                 | 0.999344539373478                                      |
| 0.00577785402619844                                    | 0.697414975305867                                                 | 0.999344539373478                                      |
| 0.00465408207867094                                    | 0.471696523553936                                                 | 0.999344539373478                                      |
| 0.00191736708822458                                    | 0.860357779453336                                                 | 0.999344539373478                                      |
| 0.000618374308053771                                   | 0.63410987881896                                                  | 0.999344539373478                                      |
| 0.000618374308053771                                   | 0.479007577066066                                                 | 0.999344539373478                                      |
| 0.00192141186787478                                    | 0.8252622825571                                                   | 0.999344539373478                                      |
| 0.00625927473671319                                    | 0.531904793268275                                                 | 0.999344539373478                                      |
| 0.14239297723395                                       | 0.0174090714300202                                                | 0.362125586016768                                      |
| 0.00208576650056552                                    | 0.454787619238195                                                 | 0.999344539373478                                      |
| 0.00126645853332265                                    | 0.952136512110961                                                 | 0.999344539373478                                      |
| 0.003942276232436                                      | 0.838477843537542                                                 | 0.999344539373478                                      |
| 0.00577785402619844                                    | 0.823914025881158                                                 | 0.999344539373478                                      |
| 0.00210131299822435                                    | 0.791289079546491                                                 | 0.999344539373478                                      |
| 0.00238846607277153                                    | 0.558941883455945                                                 | 0.999344539373478                                      |
| 0.00577785402619844                                    | 0.494359357741465                                                 | 0.999344539373478                                      |
| 0.00191736708822458                                    | 0.797356726625767                                                 | 0.999344539373478                                      |
| 0.00465408207867094                                    | 0.44237460483168                                                  | 0.999344539373478                                      |
| 0.014761036829507                                      | 0.871351973991047                                                 | 0.999344539373478                                      |
| 0.00388906418921566                                    | 0.999344539373478                                                 | 0.999344539373478                                      |
| 0.00342324837986175                                    | 0.89737804911847                                                  | 0.999344539373478                                      |
| 0.00191736708822458                                    | 0.687328925530021                                                 | 0.999344539373478                                      |
| 0.000841126268194953                                   | 0.51676795381586                                                  | 0.999344539373478                                      |
| 0.00210131299822435                                    | 0.920267103680643                                                 | 0.999344539373478                                      |
| 0.00203159468130243                                    | 0.59785511013618                                                  | 0.999344539373478                                      |
| 0.106136281867612                                      | 0.963040067896808                                                 | 0.999344539373478                                      |
| 0.0161885927007834                                     | 0.893610356551591                                                 | 0.999344539373478                                      |
| 0.0966379901967698                                     | 0.0511815632996389                                                | 0.637366425975224                                      |
| 0.00486837184885244                                    | 0.979356294324824                                                 | 0.999344539373478                                      |
| 0.0013357978631717                                     | 0.819238455982393                                                 | 0.999344539373478                                      |
| 0.00465408207867094                                    | 0.861010885366658                                                 | 0.999344539373478                                      |
| 0.00238846607277153                                    | 0.519950431694409                                                 | 0.999344539373478                                      |

# Monoallelic

|                      |                   |                   |
|----------------------|-------------------|-------------------|
| 0.00191736708822458  | 0.712287896855226 | 0.999344539373478 |
| 0.00479450274647415  | 0.885280843359738 | 0.999344539373478 |
| 0.000618374308053771 | 0.99762551886754  | 0.999344539373478 |
| 0.0443171558899014   | 0.621014182525859 | 0.999344539373478 |
| 0.00841441468808205  | 0.935467435349897 | 0.999344539373478 |
| 0.000618374308053771 | 0.818050594333129 | 0.999344539373478 |
| 0.00589030576568311  | 0.933906601806451 | 0.999344539373478 |
| 0.000618374308053771 | 0.494861680954577 | 0.999344539373478 |
| 0.0149876429383716   | 0.728813668838194 | 0.999344539373478 |
| 0.00781105458548996  | 0.447833086770088 | 0.999344539373478 |
| 0.000618374308053771 | 0.938017521986449 | 0.999344539373478 |
|                      |                   |                   |
| 0.16829              | 0.99934           | 0.99934           |
| 0.00062              | 0.0053            | 0.30221           |
| 0.02074              | 0.65981           | 0.95205           |
